# Supplementary material for: Tissue-Specific Differences in DNA Modifications (5-Hydroxymethylcytosine, 5-Formylcytosine, 5-Carboxylcytosine and 5-Hydroxymethyluracil) and Their Interrelationships
Source: PubMed Central journal article supplement (PMC4682766; doi:10.1371/journal.pone.0144859), 2015-12-14

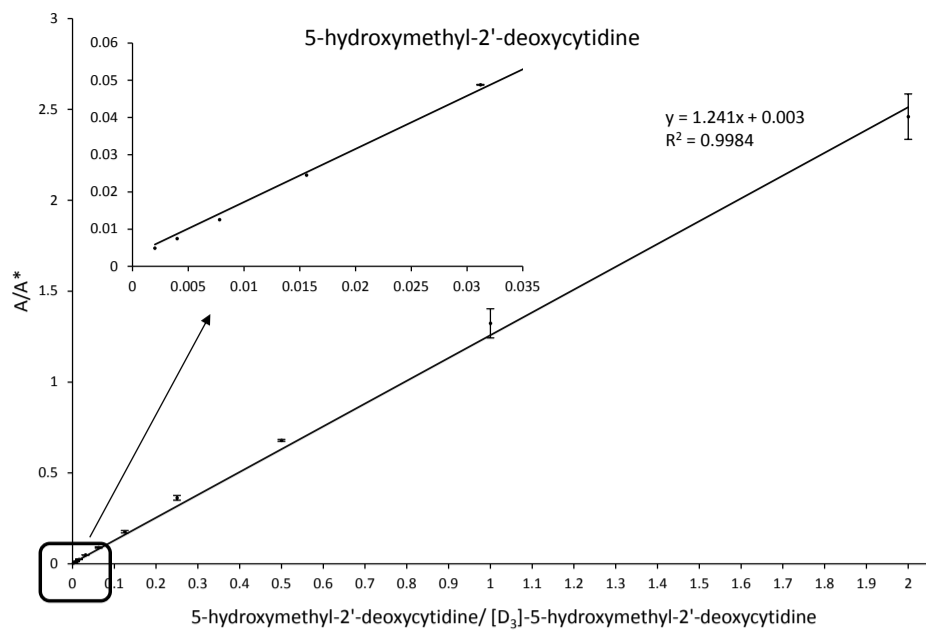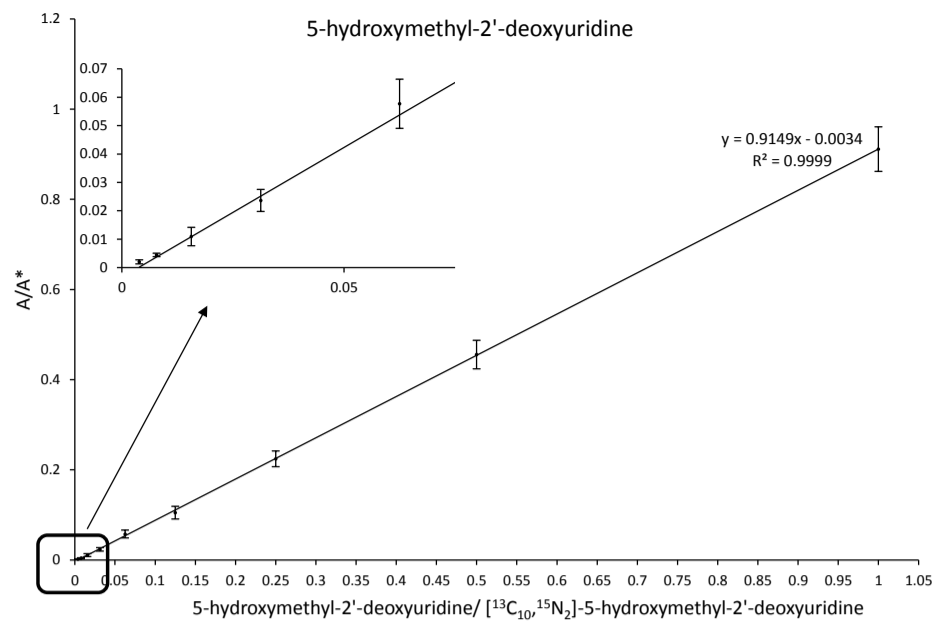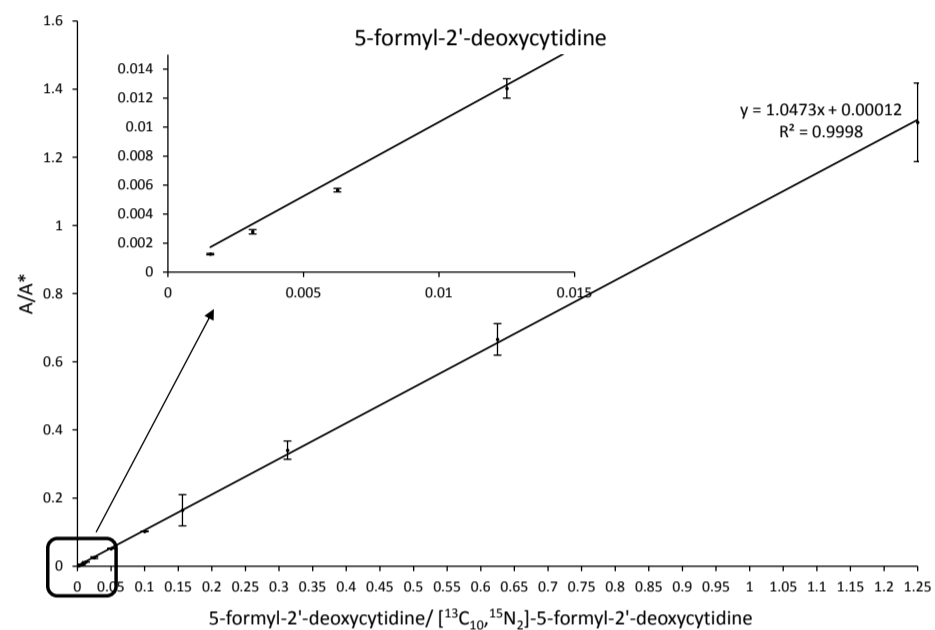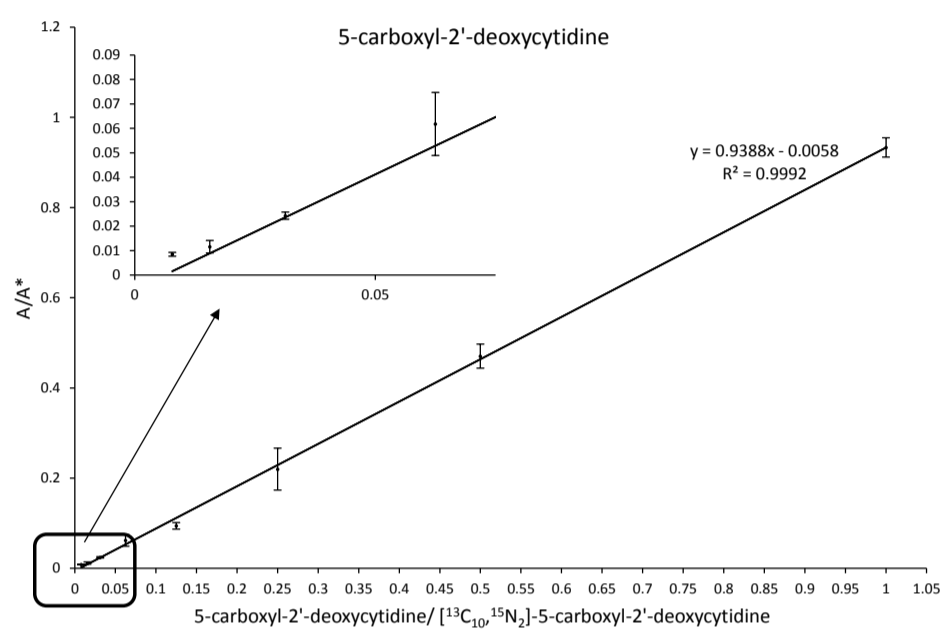

Supplement: pone.0144859.s006.pdf [file pone.0144859.s006.pdf]
