# Supplementary material for: Tissue-Specific Differences in DNA Modifications (5-Hydroxymethylcytosine, 5-Formylcytosine, 5-Carboxylcytosine and 5-Hydroxymethyluracil) and Their Interrelationships
Source: PubMed Central journal article supplement (PMC4682766; doi:10.1371/journal.pone.0144859), 2015-12-14
Supplement: pone.0144859.s007.pdf [file pone.0144859.s007.pdf]

|                   | 5-mdC/10 <sup>3</sup> dN | 5-hmdC/10 <sup>6</sup> dN | 5-fdC/10 <sup>6</sup> dN | 5-cadC/10 <sup>9</sup> dN | 5-hmdU/10 <sup>6</sup> dN |
|-------------------|--------------------------|---------------------------|--------------------------|---------------------------|---------------------------|
| pig liver 1       | 10.6828                  | 0.1387                    | 0.1415                   | 8.3281                    | 0.1824                    |
| pig liver 2       | 10.1507                  | 0.1913                    | 0.0590                   | 10.1569                   | 0.1474                    |
| pig liver 3       | 10.2292                  | 0.1994                    | 0.1148                   | 14.7446                   | 0.2776                    |
| biological mean   | 10.3542                  | 0.1764                    | 0.1051                   | 11.0765                   | 0.2025                    |
| SD                | 0.2872                   | 0.0330                    | 0.0421                   | 3.3056                    | 0.0674                    |
| pig kidney 1      | 10.7153                  | 0.2732                    | 0.1019                   | 7.4320                    | 0.1038                    |
| pig kidney 2      | 10.5613                  | 0.3714                    | 0.1435                   | 3.1074                    | 0.1143                    |
| pig kidney 3      | 10.9557                  | 0.2663                    | 0.1334                   | 5.5430                    | 0.1585                    |
| biological mean   | 10.7441                  | 0.3036                    | 0.1263                   | 5.3608                    | 0.1255                    |
| SD                | 0.1988                   | 0.0588                    | 0.0217                   | 2.1681                    | 0.0290                    |
| pig brain 1       | 10.9418                  | 1.0762                    | 0.5650                   | 26.1457                   | 0.1179                    |
| pig brain 2       | 10.3273                  | 1.5214                    | 0.5194                   | 13.4762                   | 0.0977                    |
| pig brain 3       | 10.8140                  | 1.0007                    | 0.5061                   | 24.2853                   | 0.1151                    |
| biological mean   | 10.6943                  | 1.1994                    | 0.5302                   | 21.3024                   | 0.1102                    |
| SD                | 0.3243                   | 0.2814                    | 0.0309                   | 6.8412                    | 0.0109                    |
| pig thymus 1      | 12.7942                  | 0.0442                    | 0.1297                   | 11.1940                   | 0.1064                    |
| pig thymus 2      | 12.5329                  | 0.0548                    | 0.1564                   | 10.8747                   | 0.1160                    |
| pig thymus 3      | 12.2636                  | 0.0549                    | 0.1213                   | 16.7455                   | 0.0901                    |
| biological mean   | 12.5302                  | 0.0513                    | 0.1358                   | 12.9381                   | 0.1042                    |
| SD                | 0.2653                   | 0.0061                    | 0.0183                   | 3.3012                    | 0.0131                    |
| pig lymph nodes 1 | 11.6343                  | 0.0624                    | 0.1198                   | 3.5633                    | 0.2564                    |
| pig lymph nodes 2 | 11.9657                  | 0.1236                    | 0.3657                   | 4.3521                    | 0.9348                    |
| pig lymph nodes 3 | 11.6006                  | 0.1204                    | 0.1648                   | ND                        | 0.1784                    |
| biological mean   | 11.7336                  | 0.1021                    | 0.2168                   | 3.9577                    | 0.4565                    |
| SD                | 0.2017                   | 0.0345                    | 0.1309                   | 0.5577                    | 0.4160                    |
| pig spleen 1      | 11.0769                  | 0.1539                    | 0.1465                   | 13.6401                   | 0.2864                    |
| pig spleen 2      | 10.4086                  | 0.1704                    | 0.1470                   | 5.5724                    | 0.0868                    |
| pig spleen 3      | 11.1787                  | 0.1482                    | 0.1266                   | 10.6583                   | 0.1562                    |
| biological mean   | 10.8881                  | 0.1575                    | 0.1401                   | 9.9569                    | 0.1765                    |
| SD                | 0.4184                   | 0.0115                    | 0.0116                   | 4.0793                    | 0.1013                    |
| pig heart 1       | 11.1321                  | 0.3285                    | 0.2615                   | 5.0737                    | 0.3677                    |
| pig heart 2       | 11.0876                  | 0.3849                    | 0.1426                   | 6.2149                    | 0.4135                    |
| pig heart 3       | 10.9242                  | 0.3796                    | 0.1941                   | 11.7955                   | 0.3032                    |
| biological mean   | 11.0479                  | 0.3643                    | 0.1994                   | 7.6947                    | 0.3614                    |
| SD                | 0.1095                   | 0.0312                    | 0.0597                   | 3.5969                    | 0.0554                    |
| pig intestine 1   | 11.1317                  | 0.0972                    | 0.3686                   | 17.1524                   | 0.6510                    |
| pig intestine 2   | 11.6930                  | 0.3014                    | 0.5941                   | 17.7913                   | 0.5977                    |
| pig intestine 3   | 11.3621                  | 0.1547                    | 0.3407                   | 19.2655                   | 0.6266                    |
| biological mean   | 11.3956                  | 0.1844                    | 0.4345                   | 18.0697                   | 0.6251                    |
| SD                | 0.2821                   | 0.1053                    | 0.1389                   | 1.0837                    | 0.0267                    |
| pig muscle 1      | 9.4869                   | ND                        | ND                       | ND                        | ND                        |
| pig muscle 2      | 9.6673                   | ND                        | ND                       | ND                        | ND                        |
| pig muscle 3      | 9.9896                   | 0.5387                    | 0.3637                   | 15.4300                   | 0.1439                    |
| biological mean   | 9.7146                   | 0.5387                    | 0.3637                   | 15.4300                   | 0.1439                    |
| SD                | 0.2547                   | NA                        | NA                       | NA                        | NA                        |
