# Supplementary material for: Tissue-Specific Differences in DNA Modifications (5-Hydroxymethylcytosine, 5-Formylcytosine, 5-Carboxylcytosine and 5-Hydroxymethyluracil) and Their Interrelationships
Source: PubMed Central journal article supplement (PMC4682766; doi:10.1371/journal.pone.0144859), 2015-12-14
Supplement: pone.0144859.s008.pdf [file pone.0144859.s008.pdf]

|                        | 5-mdC/10 <sup>3</sup> dN | 5-hmdC/10 <sup>6</sup> dN | 5-fdC/10 <sup>6</sup> dN | 5-cadC/10 <sup>9</sup> dN | 5-hmdU/10 <sup>6</sup> dN |
|------------------------|--------------------------|---------------------------|--------------------------|---------------------------|---------------------------|
| rat liver 1            | 8.2521                   | 0.3517                    | 0.5319                   | 10.8022                   | ND                        |
| rat liver 2            | 8.3501                   | 0.307370055               | 0.3939                   | 10.6386                   | 0.1095                    |
| biological mean        | 8.3011                   | 0.3295                    | 0.4629                   | 10.7204                   | 0.1095                    |
| SD                     | 0.0693                   | 0.0313                    | 0.0976                   | 0.1157                    | NA                        |
| rat kidney 1           | 7.7979                   | 0.5062                    | 0.2108                   | 9.2897                    | 0.2375                    |
| rat kidney 2           | 7.9689                   | 0.5153                    | 0.1974                   | 3.6130                    | 0.0755                    |
| rat kidney 3           | 7.8460                   | 0.5494                    | 0.2155                   | 3.3701                    | 0.1581                    |
| biological mean        | 7.8709                   | 0.5236                    | 0.2079                   | 5.4243                    | 0.1570                    |
| SD                     | 0.0881                   | 0.0227                    | 0.0094                   | 3.3498                    | 0.0810                    |
| rat thymus 1           | 9.1926                   | 0.0689                    | 0.1648                   | 3.8238                    | 0.3098                    |
| rat thymus 2           | 9.0758                   | 0.0606                    | 0.1647                   | 10.4073                   | 0.3175                    |
| rat thymus 3           | 9.1001                   | 0.0651                    | 0.1720                   | ND                        | 0.2039                    |
| biological mean        | 9.1229                   | 0.0649                    | 0.1672                   | 7.1155                    | 0.2770                    |
| SD                     | 0.0616                   | 0.0041                    | 0.0042                   | 4.6552                    | 0.0635                    |
| rat heart 1            | 7.5124                   | 0.4747                    | 0.3525                   | 7.5335                    | 0.2997                    |
| rat heart 2            | 7.8495                   | 0.4436                    | 0.3168                   | 6.8731                    | 0.3093                    |
| rat heart 3            | 7.6944                   | 0.4398                    | 0.2845                   | ND                        | ND                        |
| biological mean        | 7.6854                   | 0.4527                    | 0.3179                   | 7.2033                    | 0.3045                    |
| SD                     | 0.1687                   | 0.0192                    | 0.0340                   | 0.4669                    | 0.0068                    |
| rat intestine 1        | 7.7722                   | 0.2320                    | 0.3604                   | 8.5387                    | 0.3036                    |
| rat intestine 2        | 7.6411                   | 0.1960                    | 0.2787                   | 14.4273                   | 0.1188                    |
| rat intestine 3        | 7.9463                   | 0.1810                    | 0.3135                   | 12.9575                   | 0.1145                    |
| biological mean        | 7.7866                   | 0.2030                    | 0.3175                   | 11.9745                   | 0.1789                    |
| SD                     | 0.1531                   | 0.0262                    | 0.0410                   | 3.0649                    | 0.1080                    |
| rat lung 1             | 7.8770                   | 0.3592                    | 0.2447                   | 7.3627                    | 0.1811                    |
| rat lung 2             | 7.7913                   | 0.3610                    | 0.2585                   | 7.9899                    | 0.1158                    |
| rat lung 3             | 8.0307                   | 0.3212                    | 0.2184                   | ND                        | 0.1480                    |
| biological mean        | 7.8997                   | 0.3471                    | 0.2405                   | 7.6763                    | 0.1483                    |
| SD                     | 0.1213                   | 0.0225                    | 0.0204                   | 0.4435                    | 0.0327                    |
| rat brain 1            | 8.6765                   | 1.0017                    | 0.7947                   | 34.7908                   | 0.1090                    |
| SD (techn. replicates) | 0.2918                   | 0.0170                    | 0.1867                   | 2.1416                    | 0.0630                    |
